# Supplementary material
Source: publisher site journal article supplement (https://www.spandidos-publications.com/2529/downloadSupplementary)

Figure S1. (A) Western blotting results verified the protein level of ESM1 in the si-control and si-ESM1 groups. (B) Colony formation assays of LCSCs with or without si-ESM1 transfection. Data are expressed as the means  $\pm$  SEM (n=3). ESM1, endothelial cell-specific molecule-1; LCSCs, lung cancer stem cells.

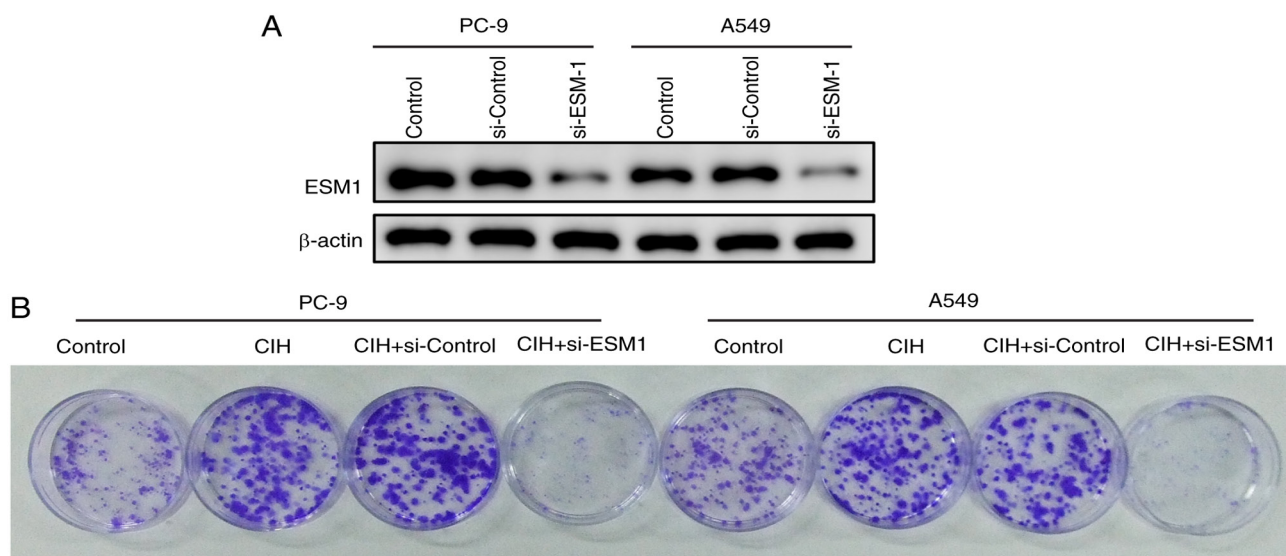

Supplement: Supplementary file 1 [file downloadSupplementary]
